1 **Comparison of ultracentrifugation and a commercial kit for isolation of**  
2 **exosomes derived from glioblastoma and breast cancer cells**

3 Frøydis Sved Skottvoll<sup>a\*</sup>, Henriette Engen Berg<sup>a\*</sup>, Kamilla Bjørseth<sup>a</sup>, Kaja Lund<sup>b</sup>, Norbert  
4 Roos<sup>c</sup>, Sara Bekhradnia<sup>a</sup>, Bernd Thiede<sup>c</sup>, Cecilie Sandberg<sup>d</sup>, Einar Osland Vik-Mo<sup>d,e</sup>, Hanne  
5 Roberg-Larsen<sup>a</sup>, Bo Nyström<sup>a</sup>, Elsa Lundanes<sup>a</sup>, Steven Ray Wilson<sup>a†</sup>

6 <sup>a</sup> Department of Chemistry, University of Oslo, Post Box 1033, Blindern, NO-0315 Oslo, Norway

7 <sup>b</sup> Department of Microbiology, Unit Cell Signaling, Oslo University Hospital, Gaustadalleen 34,  
8 NO-0372 Oslo, Norway

9 <sup>c</sup> Department of Biosciences, University of Oslo, Post Box 1066, Blindern, NO-0316 Oslo, Norway

10 <sup>d</sup> Vilhelm Magnus Laboratory of Neurosurgical Research, Institute for Surgical Research and  
11 Department of Neurosurgery, Oslo University Hospital, 4950 Nydalen, NO-0424 Oslo, Norway

12 <sup>e</sup> Institute of Clinical Medicine, Faculty of Medicine, University of Oslo, Post Box 1171,  
13 Blindern, 0318 Oslo, Norway

14 Corresponding author: [stevenw@kjemi.uio.no](mailto:stevenw@kjemi.uio.no), +47 97010953. [https://orcid.org/0000-0002-](https://orcid.org/0000-0002-9755-1188)  
15 9755-1188

16

17

18

19

20

21

## 22 **Abstract**

23 Exosomes are a potentially rich source of biomarkers, but their isolation and characterization can  
24 be challenging. For isolation of exosomes, differential ultracentrifugation (a traditional approach)  
25 and an isolation kit from a major vendor (Total Exosome Isolation Reagent from Thermo Fisher  
26 Scientific) were compared. “Case study” exosomes were isolated from cell culture media of two  
27 different cell sources, namely patient-derived cells from glioblastoma multiforme and the breast  
28 cancer cell line MDA-MB-231. For both isolation methods, transmission electron microscopy  
29 and dynamic light scattering indicated the presence of exosomes. The kit- and UC isolates  
30 contained similar amounts of protein measured by the bicinchoninic acid (BCA) assay with  
31 absorbance at 562 nm. Using western blot, positive exosome markers were identified in all  
32 isolates. Potential biomarkers for both diseases were also identified in the isolates using LC-  
33 MS/MS. However, WB and LC-MS/MS also revealed negative exosome markers regarding both  
34 isolation approaches. The two isolation methods had an overall similar performance, but we  
35 hesitate to use the term “exosome isolation” as impurities may be present with both isolation  
36 methods. LC-MS/MS can detect disease biomarkers in exosomes and is also highly useful for  
37 critical assessment of exosome enrichments.

38  
39 **Key words:** Exosomes; Ultracentrifugation; Proteomics; Glioblastoma; Breast cancer; LC-  
40 MS/MS

41

42

43

## 44 **1 Introduction**

45 Exosomes are extracellular vesicles (EVs) with membrane-surrounded bodies which are secreted  
46 from cells to the extracellular environment as a part of the endocytic pathway [1]. Exosomes are  
47 formed by invagination of an endosome membrane to create intraluminal vesicles inside the  
48 endosome, i.e. multivesicular bodies (MVBs), and are secreted when the endosomes fuse with the  
49 plasma membrane [2]. Exosomes commonly contain proteins originating from the cellular  
50 cytosol and the plasma membrane, nucleic acids (e.g. DNA, mRNA, microRNA and non-coding  
51 RNA), lipids and metabolites [3-5,1,6-8], and are believed to take part in e.g. cell-cell  
52 communication, transfer of proteins/nucleic acids, coagulation and antigen presentation [6,9].

53 Cancer cells have been found to release more exosomes than stromal cells [10,11] and exosomes  
54 are associated with metastasis and tumor progression [7,12,13]. Hence, cancer exosomes may be  
55 a source of biomarkers for diagnosing cancers such as breast cancer (BC) and glioblastoma  
56 multiforme (GBM) when e.g. isolated from body fluids. BC is the predominant type of female  
57 cancer [14], with recurrent metastatic disease being responsible for the majority of BC-caused  
58 deaths [15]. GBM is the most frequent and malignant form of brain cancer [16-18]. The diagnosis  
59 of both BC and GBM rely on highly invasive patient tissue biopsies at relatively late stages  
60 [16,19,20]. Thus, a non-invasive disease monitoring is desirable for both BC and GBM, and can  
61 be achieved by measuring biomarkers in accessible body fluids, such as blood (liquid biopsy), for  
62 early diagnosis and prognosis assessment [16,21-23]. Hence, the isolation of exosomes for cancer  
63 biomarker discovery has emerged as an alternative to invasive methodologies [24-31,23].

64 Isolation of exosomes is predominantly performed from body fluids (e.g. blood, urine, and saliva)  
65 or cell culture media by centrifugation-based methods, e.g. sucrose density gradient  
66 centrifugation or ultracentrifugation (UC) [32,33]. However, common drawbacks of using UC-

67 based exosome isolation methods are the large amounts of starting material needed, low yield,  
68 and poor reproducibility [34,35]. Moreover, there is a great need for exosome isolation protocols  
69 tailored towards smaller starting volumes for e.g. miniaturized cell culture models like organoids  
70 and “organ on a chip” [36,37]. Other exosome isolation protocols and principles have been  
71 developed to overcome the drawbacks of UC based methods. Among these, filtration,  
72 immunoaffinity capturing, size exclusion chromatography, flow field-flow fractionation and also  
73 acoustic trapping have been attempted [34,38-42,8,43,44]. In addition, different commercial  
74 exosome isolation kits are available (e.g. ExoQuick<sup>TM</sup> from Systems Biosciences, and Total  
75 Exosome Isolation<sup>TM</sup> from Thermo Fisher), enabling simple isolation of exosomes from small  
76 starting volumes from a wide range of matrices. The exosome isolation kits are known to be  
77 based on exosome precipitation at low-speed centrifugation after sample incubation with water-  
78 excluding polymers such as polyethylene glycol (PEG) [45].

79 We have compared two exosome isolation methods, namely UC and a commercial kit for  
80 precipitation of exosomes. The methods were evaluated using the following characterization  
81 techniques: WB, transmission electron microscopy (TEM), dynamic light scattering (DLS),  
82 quantitative total protein analysis using UV-Vis spectrophotometry and LC-MS/MS. “Case  
83 study” exosomes were isolated from cell culture media from free-floating patient-derived primary  
84 cell cultures from GBM biopsies (T1018) and a serum cultivated, adherently growing BC cell  
85 line (MDA-MB-231).

86

87

88

## 89 **2 Materials and Methods**

90

### 91 **2.1 MDA MB-231 cell culturing**

92 The BC cell line was purchased from American Type Culture Collection (ATCC, Sesto San  
93 Giovanni, Milan, Italy) and is derived from a triple-negative human metastatic breast carcinoma.

94 The cells were maintained in Rosewell Park Memorial Institute (RPMI) 1640 growth medium  
95 depleted of phenol red (Sigma-Aldrich, St. Louis, MO, USA) supplemented with 10 % exosome-  
96 depleted fetal bovine serum (FBS) (System Biosciences, Palo Alto, CA, USA) and 1 %  
97 penicillin/streptomycin (Sigma- Aldrich). The cells were incubated in a humidifying atmosphere  
98 at 5 % CO<sub>2</sub> and at 37 °C. Prior to exosome isolation, 1-2.3 million cells (in T75-T175 culturing  
99 flasks) were incubated for 6-7 days (always using a passage lower than 12). The incubated cell  
100 culture medium was centrifuged at 906 × g (30 minutes at 23 °C). See also **Supplementary 1**  
101 **(S1)**.

102

### 103 **2.2 Glioblastoma cell culturing**

104 The GBM cells (T1018) were derived from biopsies from a primary GBM tumor, obtained after  
105 informed consent through a biobank approved by the Regional Ethical Authorities operated at  
106 Oslo University Hospital (2016/1791). The cells were maintained in Dulbecco's modified eagle  
107 medium with nutrient mixture F-12 (DMEM/F12, Gibco, Thermo Fisher Scientific, Waltham,  
108 MA, USA), supplemented with HEPES buffer (10 mM) and penicillin/streptomycin (100 U/mL)  
109 from Lonza (Basel, Switzerland), B27 without vitamin A (1/50) from Thermo Fisher Scientific,  
110 epidermal growth factor (20 ng/mL) and basic fibroblast growth factor (10 ng/ mL) from R&D  
111 Systems (Minneapolis, MN, USA) and heparin (2.5 µg/mL) obtained from LEO Pharma AS

112 (Ballerup, Denmark). Under these culturing conditions, cells express stem cell markers *in vitro*,  
113 differentiate upon removal of growth factors and give rise to diffusely infiltrative tumors upon  
114 xenografting [46]. The cells were incubated in a humidifying atmosphere at 5 % CO<sub>2</sub> and 37 °C  
115 in T25 flasks (Thermo Fisher Scientific). Prior to exosome isolation, the incubated cell culture  
116 medium was centrifuged twice at 453 × g and 1811 × g for 5 minutes each. The cell pellets were  
117 harvested for WB analysis. See also **S1**.

118

### 119 **2.3 Exosome isolation by ultracentrifugation**

120 For the BC and GBM cells, 9-12 mL and 60 mL cell culture media were used for centrifugation,  
121 respectively. Cell culture media were first centrifuged at 1811 × g (5 minutes at 20 °C). The  
122 supernatants were then centrifuged at 20 000 × g (20 minutes at 4 °C) with an Allegra 25R  
123 centrifuge (with TA-14-50 rotor) from Beckman Coulter (Brea, CA, USA) and the supernatants  
124 were transferred to polycarbonate ultracentrifugation tubes (Beckman Coulter) and diluted with  
125 PBS (~60 mL in each). The tubes were centrifuged twice at 100 000 × g (90 minutes at 4 °C)  
126 with an L-80 ultracentrifuge (45 Ti rotor) from Beckman Coulter. The supernatants were  
127 removed (leaving suspension 1 cm above the pellets) and the pellets were suspended with PBS  
128 between the centrifugations. Upon centrifugation, the supernatants were discarded and the  
129 exosome pellets (UC isolates) were suspended in either PBS (3 mL for DLS- and 50-100 μL for  
130 TEM analysis) or the preferred lysis buffer.

131

### 132 **2.4 Exosome isolation by isolation kit**

133 The isolation of exosomes with the kit was performed with the Total Exosome Isolation Reagent  
134 (from cell culture media) from Thermo Fisher Scientific (catalog no. 4478359). The isolation was  
135 performed according to the protocol of the supplier [47]. Starting volumes ranged from 0.5 mL to

136 9 mL cell culture medium for the BC cells and 5 mL to 6 mL for the GBM cells. The samples  
137 were centrifuged with the Allegra 25R centrifuge, and the exosome pellets (kit isolates) were  
138 suspended as with UC.

139

## 140 **2.5 Protein extraction**

141 Cell and exosome protein extracts were made by lysis with RIPA- or Nonidet™ P40 (NP40)  
142 buffer (both from Thermo Fisher Scientific) containing protease inhibitors (Protease Inhibitor  
143 Cocktail Tablets, Roche, Basel, Switzerland) and phosphatase inhibitors (PhosStop Tablets,  
144 Sigma-Aldrich). See also **S2**.

145

## 146 **2.6 UV-Vis spectrophotometry**

147 The protein amount was measured using Pierce™ BCA protein Assay Kit (Thermo Fisher  
148 Scientific), by measuring the absorbance at 562 nm. See also **S3**.

149

## 150 **2.7 Western blotting**

151 For information about WB antibodies, procedures and equipment, see **S4**.

152

## 153 **2.8 Immunogold labeling and transmission electron microscopy**

154 Samples were visualized with a JEM-1400Plus transmission electron microscope from JEOL  
155 (Tokyo, Japan) and images were recorded at 80 kV. See also **S5**.

156

## 157 **2.9 Dynamic light scattering**

158 The DLS experiments were conducted with the aid of an ALV/CGS-8F multi-detector version  
159 compact goniometer system, with 8 fiber-optical detection units, from ALV-GmbH, Langen,  
160 Germany. See **S6** for more details.

161

## 162 **2.10 LC-MS/MS analysis**

163 LC-MS/MS was performed using Q-Exactive mass spectrometers (Thermo) coupled with liquid  
164 nano chromatography. Samples were prepared by in-solution and in-gel protease digestion. See  
165 **S7-9** for additional information related to LC-MS/MS analysis.

166

## 167 **3 Results and Discussion**

168

### 169 **3.1 Similar content of protein measured in kit- and UC isolates**

170 The protein amount per million cells (hereafter referred to as protein amount) in the BC- (**Figure**  
171 **1A**) and GBM- (**Figure 1B**) isolates was measured using UV-Vis spectrophotometry. The  
172 measurements for kit isolates were 15-28 times higher than for UC isolates. A higher protein  
173 amount in exosomes isolated by the kit compared to that by UC was also observed in a study by  
174 Van Deun et al. who compared UC to the same isolation kit used in the present study for MCF7  
175 derived exosomes [48]. However, we observed that the measured absorbance in the kit blanks  
176 was high in comparison to UC blanks, where the absorbance was below the limit of  
177 quantification. The high absorbance from the kit blanks was further assessed to establish possible  
178 UV-absorbents or scattering components in the kit reagent. However, no absorbance was  
179 measured in the kit reagent using the same protocol (i.e. absorbance at 562 nm after BCA-



180 reaction) as for the isolates and blanks, and NMR spectroscopy showed sharp peaks implying an  
181 absence of relaxation-perturbing components, e.g. particles (results not shown). The high  
182 absorbance in the kit blanks might therefore indicate co-precipitation of proteins or other UV-  
183 absorbing compounds from the blank media. When correcting for the blank (subtracting the  
184 protein amount measured in blank samples from the protein amount in exosome isolates), the  
185 measured protein content for exosomes isolated by the kit and UC was similar.

186

### 187 **3.2 TEM and DLS detected vesicles in the expected size range for exosomes**

188 Morphological analysis of the exosome samples was performed using TEM. In addition, the  
189 hydrodynamic particle size distribution was measured using DLS. Clusters of vesicles were  
190 observed in the micrographs of the samples isolated with both kit and UC (**Figure 2, AI and**  
191 **AIII**). Vesicle structures similar to that described in literature were observed [49,50,6].  
192 Regarding GBM exosomes: With TEM, the UC isolates presented somewhat more distinct  
193 double membranes compared to the kit isolates. The blank samples for both isolation methods did  
194 not display membrane structures (**Figure 2, AII and AIV**). The DLS-analysis of the GBM  
195 isolates exhibited particles of similar sizes of 51 and 73 nm (mean) with both isolation methods  
196 (**Figure 2B**). Thus, both isolation methods gave rise to comparable exosome populations.  
197 Regarding BC exosomes: Clusters of vesicles were also in here observed in the micrographs of  
198 the samples isolated with both kit and UC (**Figure 2, CI and CIII**). Blank isolates displayed  
199 contaminations (**Figure 2, CII and CIV**), e.g. exosome-resembling vesicles were found in the  
200 UC blank using TEM (red dashed circles), and the kit blank displayed 67 nm (mean)  
201 contaminations when using DLS (**Figure 2D**). The DLS analysis also presented two distinct  
202 particle diameters in kit isolates (28 and 95 nm, mean values) while only one particle diameter  
203 was present in UC isolates (137 nm, mean value), indicating some differences in the mean

204 particle sizes isolated with the two isolation methods. However, the sizes observed with DLS  
205 correlates well with that found in other studies (30–250 nm) [51,52,13,53,54,48,55]. Overall, the  
206 isolates showed structures resembling those of EVs, but some blanks were not entirely devoid of  
207 vesicles or particles.

208

### 209 **3.3. Western blot analyses indicated the presence of exosomes for all samples.**

210 WB was performed using antibodies for a selection of positive exosome markers, namely the  
211 tetraspanins CD81, CD9 and CD63, TSG101 and flotillin-1. Calnexin was selected as a negative  
212 marker for purity evaluation as recommended by the International Society of Extracellular  
213 vesicles (ISEV) [56]. This protein is located at the endoplasmic reticulum (ER) and is assumed to  
214 signalize ER-contamination. For the GBM cells and exosomes, positive and negative exosome  
215 markers were detected in isolates from both the kit and UC (**Figure 3**). For the BC cells and  
216 exosomes, positive markers TSG101, flotillin-1 and CD9 (barely visible in the UC isolates) were  
217 detected using both isolation methods, and calnexin was not detected. The positive markers  
218 overall demonstrate the presence of exosomes in the isolates obtained using both methods, but the  
219 GBM samples could contain impurities.

220

### 221 **3.4 LC-MS/MS studies reveal impurities, and biomarkers**

222 The absence of calnexin (see above) in BC exosomes from both isolation methods indicates that  
223 the isolates are not contaminated with the ER. However, general proteins related to e.g. the  
224 nucleus, Golgi apparatus, mitochondrion, and ER were identified in the BC exosomes using LC-  
225 MS/MS and gene ontology (GO) annotations (**Figure 4**). Hence, untargeted LC-MS/MS  
226 suggested the presence of impurities also in the BC samples. Proteins related to the nucleosome,

227 Golgi apparatus, mitochondrion, and ER were also identified by GO-annotation in the GBM  
228 isolates.  
229 LC-MS/MS could also identify a number of positive markers (see **Figure 5** for examples).  
230 However, there was expectedly not a complete overlap with those observed with WB, as e.g.  
231 sensitivity can vary between WB and untargeted LC-MS/MS. In-house prepared nanoLC  
232 columns packed with core shell particles provided high-resolution separations (**Figure 5**, and see  
233 reference [57] for packing procedure). Examples of potential biomarkers for GBM, e.g. heat  
234 shock proteins 70 kDa and 90 kDa [58-60], chondroitin sulfate proteoglycan 4 [58,61], CD44  
235 [62,58,61] and CD276 [63] were identified using LC-MS/MS. Examples of LC-MS/MS-detected  
236 biomarkers related to triple negative breast cancer were e.g. heat shock 90 kDa  $\alpha$  and  $\beta$  protein  
237 [64], calmodulin and epidermal growth factor receptor [65] (see **Supplemental Proteins**). When  
238 comparing cell sources, the number of identified proteins was lower in GBM isolates than BC  
239 isolates, but the number of identified proteins for GBM isolates was comparable to another LC-  
240 MS/MS study on GBM exosomes [66].

241

## 242 **4 Conclusions**

243 Regarding our glioblastoma/breast cancer “case study” samples, the UC/kit isolation methods  
244 overall were approximately equal in quality. Kit isolation however has an advantage of requiring  
245 less starting material compared to conventional UC equipment. Untargeted LC-MS/MS revealed  
246 a number of biomarkers related to the diseases, supporting the concept of exosomes being an  
247 interesting matrix towards diagnostics. In addition to exosomes, our analyses suggest the  
248 presence of cellular contaminations and other vesicles. Hence, the “isolations” should perhaps be

249 considered “enrichments”. Considering that the methods do not fully provide isolations, we  
250 welcome alternative approaches to preparing and analyzing these important extracellular vesicles.  
251

## 252 **Acknowledgments**

253 This work was supported by the Department of Chemistry, University of Oslo, Norway. We  
254 would like to acknowledge DIATECH@UiO, since parts of this work have been carried out  
255 within this strategic research initiative at the Faculty of Mathematics and Natural Sciences,  
256 University of Oslo. This work has also been supported by the UiO:Life Science funded  
257 convergence environment “Organ on a chip and nano-devices”. Conflict of Interest: The authors  
258 declare that they have no conflict of interest.

259

## 260 **Figure Captions**

261

262 **Figure 1 Measured relative protein amount pr. million cells in exosome samples from**  
263 **GBM- and BC cells isolated by kit and UC (n ≥ 2). A)** The measured relative protein amount  
264 (%) for the BC exosome isolates. **B)** The measured relative protein amount (%) for the GBM  
265 exosome isolates. Each replicate is depicted as circles, and the median depicted as a line. The X-  
266 mark shows the measured relative protein amount in the blank sample (isolated cell culture  
267 medium). The protein amounts were measured by UV-Vis spectrophotometry (absorption at  $\lambda=$   
268 562 nm) after reaction with BCA kit reagents.

269

270 **Figure 2 Transmission electron micrographs and hydrodynamic particle size (nm)**  
271 **distribution by DLS analysis of exosomes isolated by kit and UC from GBM- and BC cells.**

272 Images were taken with a magnification of 400 000, and the dashed areas were additionally  
273 zoomed. **A)** Micrographs of GBM exosome isolates (not CD9-labelled). **I** depict the micrograph  
274 from a kit isolate, **II** the kit blank, **III** a UC isolate, and **IV** the UC blank. **B)** DLS analysis of  
275 GBM exosomes isolated by kit and UC (n = 1). No particles were detected in the UC blank (n =  
276 1). DLS analysis of the kit blank was not performed. **C)** Micrographs of BC exosome isolates  
277 (successfully CD9-labelled). **I** depict the micrograph from a kit isolate, **II** the kit blank, **III** a UC  
278 isolate, and **IV** the UC blank. **D)** DLS analysis of BC exosomes isolated by kit (n = 2) and UC (n  
279 = 3), including the kit blank (n = 1). No particles were detected in the UC blank.

280  
281 **Figure 3 Western blot of common protein exosome markers.** The protein markers CD81,  
282 CD9, CD63, TSG101, flotillin-1 (positive markers, +) and calnexin (negative marker, -) were  
283 targeted in cell lysates and exosomes isolated by kit and UC (n ≥ 2). Monoclonal mouse  
284 antibodies were used for CD81, CD9, CD63, flotillin-1 and calnexin, while a polyclonal rabbit  
285 antibody was used for TSG101. For the BC exosomes, 15 µg protein was loaded for kit isolates  
286 and 3 µg for UC isolates. For the GBM exosomes, ~14 µg was loaded for kit isolates and ~8 µg  
287 for UC isolates. Uncropped western blots are presented in **Supplemental Western Blots**.

288  
289 **Figure 4 Chromatograms and MS/MS spectrums from LC-MS/MS analysis of GBM- and**  
290 **BC exosome peptides.** **A)** Chromatogram with corresponding MS/MS spectrum for the CD9  
291 signature peptide KDVLETFTVK ( $m/z=393.89$ ,  $z=3$ ) in BC exosomes isolated by  
292 UC. **C)** Chromatogram with corresponding MS/MS spectrum for the calnexin signature peptide  
293 AEDEILNR ( $m/z=544.77$ ,  $z=2$ ) from GBM exosomes isolated by UC. An in-house packed 50  
294 µm x 150 mm column with 80 Å Accucore particles with C<sub>18</sub> stationary phase was used for  
295 separation. A 50 µm x ~3 mm in-house packed pre-column with the same column material was

296 used for trapping. The elution was performed with a linear gradient of 3-15 % MP B in 120  
297 minutes. See **Section 2.11.1** for more LC-MS/MS parameters.

298  
299 **Figure 5 GO annotation of proteins in BC exosomes to different cellular locations.** The  
300 identified proteins classified by their cellular location (GO annotations) grouped based on their  
301 positive/ negative relevance towards exosomes. The annotated proteins (% of total proteins) and  
302 their cellular location, with proteins annotated from the kit isolates are shown in red (from 749  
303 DAVID ID's), while proteins annotated from the UC isolates are shown in blue (from 615  
304 DAVID ID's).

305  
306 **Figure 6 Venn diagram presenting the number of proteins identified by LC-MS/MS in**  
307 **exosomes isolated by kit and UC from GBM- and BC cell culture medium.** The numbers are  
308 the total number of unique proteins identified when trypsin, keratin related proteins and the  
309 proteins identified in blank isolates were disregarded. One signature peptide was selected as  
310 requirement for positive identifications during database search. Equal amounts of protein were  
311 injected for both kit- and UC isolates (~ 1.5 µg protein for GBM isolates (n = 6) and ~2-5 µg  
312 protein for BC exosomes (n=3)). A list of all proteins identified is presented in **Supplemental**  
313 **Proteins.**

314  
315

## 316 **References**

- 317 1. Théry C, Zitvogel L, Amigorena S (2002) Exosomes: composition, biogenesis and function.  
318 Nature Reviews Immunology 2:569. doi:10.1038/nri855  
319 2. Lener T, Gimona M, Aigner L, Borger V, Buzas E, Camussi G, Chaput N, Chatterjee D, Court FA,  
320 del Portillo HA, O'Driscoll L, Fais S, Falcon-Perez JM, Felderhoff-Mueser U, Fraile L, Gho YS,

- 321 Gorgens A, Gupta RC, Hendrix A, Hermann DM, Hill AF, Hochberg F, Horn PA, de Kleijn D,  
322 Kordelas L, Kramer BW, Kramer-Albers EM, Laner-Plamberger S, Laitinen S, Leonardi T,  
323 Lorenowicz MJ, Lim SK, Lotvall J, Maguire CA, Marcilla A, Nazarenko I, Ochiya T, Patel T,  
324 Pedersen S, Pocsfalvi G, Pluchino S, Quesenberry P, Reischl IG, Rivera FJ, Sanzenbacher R,  
325 Schallmoser K, Slaper-Cortenbach I, Strunk D, Tonn T, Vader P, van Balkom BWM, Wauben M, El  
326 Andaloussi S, Thery C, Rohde E, Giebel B (2015) Applying extracellular vesicles based  
327 therapeutics in clinical trials - an ISEV position paper. *J Extracell Vesicles* 4:31.  
328 doi:10.3402/jev.v4.30087
- 329 3. Zhao H, Yang L, Baddour J, Achreja A, Bernard V, Moss T, Marini JC, Tudawe T, Seviour EG, San  
330 Lucas FA, Alvarez H, Gupta S, Maiti SN, Cooper L, Peehl D, Ram PT, Maitra A, Nagrath D (2016)  
331 Tumor microenvironment derived exosomes pleiotropically modulate cancer cell metabolism.  
332 *eLife* 5:e10250. doi:10.7554/eLife.10250
- 333 4. Skotland T, Sandvig K, Llorente A (2017) Lipids in exosomes: Current knowledge and the way  
334 forward. *Progress in Lipid Research* 66:30-41. doi:<https://doi.org/10.1016/j.plipres.2017.03.001>
- 335 5. Beach A, Zhang H-G, Ratajczak MZ, Kakar SS (2014) Exosomes: an overview of biogenesis,  
336 composition and role in ovarian cancer. *Journal of Ovarian Research* 7:14-14. doi:10.1186/1757-  
337 2215-7-14
- 338 6. Li P, Kaslan M, Lee SH, Yao J, Gao Z (2017) Progress in Exosome Isolation Techniques.  
339 *Theranostics* 7 (3):789-804. doi:10.7150/thno.18133
- 340 7. Becker A, Thakur BK, Weiss JM, Kim HS, Peinado H, Lyden D (2016) Extracellular Vesicles in  
341 Cancer: Cell-to-Cell Mediators of Metastasis. *Cancer Cell* 30 (6):836-848.  
342 doi:<https://doi.org/10.1016/j.ccell.2016.10.009>
- 343 8. Pocsfalvi G, Stanly C, Fiume I, Vekey K (2016) Chromatography and its hyphenation to mass  
344 spectrometry for extracellular vesicle analysis. *J Chromatogr A* 1439:26-41.  
345 doi:10.1016/j.chroma.2016.01.017
- 346 9. Farahani M, Rubbi C, Liu L, Slupsky JR, Kalakonda N (2015) CLL exosomes modulate the  
347 transcriptome and behaviour of recipient stromal cells and are selectively enriched in miR-202-  
348 3p. *PloS one* 10 (10):e0141429
- 349 10. Logozzi M, De Milito A, Lugini L, Borghi M, Calabro L, Spada M, Perdicchio M, Marino ML,  
350 Federici C, Iessi E, Brambilla D, Venturi G, Lozupone F, Santinami M, Huber V, Maio M, Rivoltini  
351 L, Fais S (2009) High Levels of Exosomes Expressing CD63 and Caveolin-1 in Plasma of Melanoma  
352 Patients. *Plos One* 4 (4):10. doi:10.1371/journal.pone.0005219
- 353 11. Parolini I, Federici C, Raggi C, Lugini L, Palleschi S, De Milito A, Coscia C, Iessi E, Logozzi M,  
354 Molinari A, Colone M, Tatti M, Sargiacomo M, Fais S (2009) Microenvironmental pH Is a Key  
355 Factor for Exosome Traffic in Tumor Cells. *J Biol Chem* 284 (49):34211-34222.  
356 doi:10.1074/jbc.M109.041152
- 357 12. Peinado H, Alečković M, Lavotshkin S, Matei I, Costa-Silva B, Moreno-Bueno G, Hergueta-  
358 Redondo M, Williams C, García-Santos G, Ghajar CM (2012) Melanoma exosomes educate bone  
359 marrow progenitor cells toward a pro-metastatic phenotype through MET. *Nature medicine* 18  
360 (6):883-891
- 361 13. Harris DA, Patel SH, Gucek M, Hendrix A, Westbroek W, Taraska JW (2015) Exosomes  
362 released from breast cancer carcinomas stimulate cell movement. *PloS one* 10 (3):e0117495

- 363 14. DeSantis CE, Lin CC, Mariotto AB, Siegel RL, Stein KD, Kramer JL, Alteri R, Robbins AS, Jemal A  
364 (2014) Cancer treatment and survivorship statistics, 2014. *CA: A Cancer Journal for Clinicians* 64  
365 (4):252-271. doi:10.3322/caac.21235
- 366 15. Redig AJ, McAllister SS (2013) Breast cancer as a systemic disease: a view of metastasis.  
367 *Journal of Internal Medicine* 274 (2):113-126. doi:10.1111/joim.12084
- 368 16. Touat M, Duran-Pena A, Alentorn A, Lacroix L, Massard C, Idbah A (2015) Emerging  
369 circulating biomarkers in glioblastoma: promises and challenges. *Expert Rev Mol Diagn* 15  
370 (10):1311-1323. doi:10.1586/14737159.2015.1087315
- 371 17. Molina JR, Hayashi Y, Stephens C, Georgescu MM (2010) Invasive Glioblastoma Cells Acquire  
372 Stemness and Increased Akt Activation. *Neoplasia* 12 (6):453-U437. doi:10.1593/neo.10126
- 373 18. Preusser M, de Ribaupierre S, Wohrer A, Erridge SC, Hegi M, Weller M, Stupp R (2011)  
374 Current Concepts and Management of Glioblastoma. *Ann Neurol* 70 (1):9-21.  
375 doi:10.1002/ana.22425
- 376 19. Jan Chrastina ZN, Milan Brazdil, Marketa Hermanova (2015) Glioblastoma multiforme in a  
377 patient with isolated hemimegalencephaly. *Journal of Neurological Surgery Reports* 76 (1):160-  
378 163. doi:ht tp://dx.doi.org/  
379 10.1055/s -0035- 1554929.
- 380 20. Shao HL, Chung J, Lee K, Balaj L, Min C, Carter BS, Hochberg FH, Breakefield XO, Lee H,  
381 Weissleder R (2015) Chip-based analysis of exosomal mRNA mediating drug resistance in  
382 glioblastoma. *Nat Commun* 6:9. doi:10.1038/ncomms7999
- 383 21. Best MG, Sol N, Zijl S, Reijneveld JC, Wesseling P, Wurdinger T (2015) Liquid biopsies in  
384 patients with diffuse glioma. *Acta Neuropathol* 129 (6):849-865. doi:10.1007/s00401-015-1399-  
385 y
- 386 22. Cristofanilli M, Budd GT, Ellis MJ, Stopeck A, Matera J, Miller MC, Reuben JM, Doyle GV,  
387 Allard WJ, Terstappen LW (2004) Circulating tumor cells, disease progression, and survival in  
388 metastatic breast cancer. *New England Journal of Medicine* 351 (8):781-791
- 389 23. He M, Zeng Y (2016) Microfluidic Exosome Analysis toward Liquid Biopsy for Cancer. *Journal*  
390 *of laboratory automation* 21 (4):599-608. doi:10.1177/2211068216651035
- 391 24. Melo SA, Luecke LB, Kahlert C, Fernandez AF, Gammon ST, Kaye J, LeBleu VS, Mittendorf EA,  
392 Weitz J, Rahbari N (2015) Glypican-1 identifies cancer exosomes and detects early pancreatic  
393 cancer. *Nature* 523 (7559):177-182
- 394 25. Taylor DD, Gercel-Taylor C (2008) MicroRNA signatures of tumor-derived exosomes as  
395 diagnostic biomarkers of ovarian cancer. *Gynecologic Oncology* 110 (1):13-21
- 396 26. Roberg-Larsen H, Lund K, Seterdal KE, Solheim S, Vehus T, Solberg N, Krauss S, Lundanes E,  
397 Wilson SR (2017) Mass spectrometric detection of 27-hydroxycholesterol in breast cancer  
398 exosomes. *The Journal of steroid biochemistry and molecular biology* 169:22-28
- 399 27. Skog J, Würdinger T, Van Rijn S, Meijer DH, Gainche L, Curry WT, Carter BS, Krichevsky AM,  
400 Breakefield XO (2008) Glioblastoma microvesicles transport RNA and proteins that promote  
401 tumour growth and provide diagnostic biomarkers. *Nature cell biology* 10 (12):1470-1476
- 402 28. Hochberg FH, Atai NA, Gonda D, Hughes MS, Mawejje B, Balaj L, Carter RS (2014) Glioma  
403 diagnostics and biomarkers: an ongoing challenge in the field of medicine and science. *Expert*  
404 *Rev Mol Diagn* 14 (4):439-452. doi:10.1586/14737159.2014.905202



- 405 29. Saadatpour L, Fadaee E, Fadaei S, Mansour RN, Mohammadi M, Mousavi SM, Goodarzi M,  
406 Verdi J, Mirzaei H (2016) Glioblastoma: exosome and microRNA as novel diagnosis biomarkers.  
407 *Cancer Gene Ther* 23 (12):415-418. doi:10.1038/cgt.2016.48
- 408 30. Mondal A, Singh DK, Panda S, Shiras A (2017) Extracellular Vesicles As Modulators of Tumor  
409 Microenvironment and Disease Progression in Glioma. *Front Oncol* 7:8.  
410 doi:10.3389/fonc.2017.00144
- 411 31. Keller S, Ridinger J, Rupp A-K, Janssen JW, Altevogt P (2011) Body fluid derived exosomes as  
412 a novel template for clinical diagnostics. *Journal of translational medicine* 9 (1):86
- 413 32. Théry C, Amigorena S, Raposo G, Clayton A (2006) Isolation and characterization of  
414 exosomes from cell culture supernatants and biological fluids. *Current Protocols in Cell*  
415 *Biology*:3.22. 21-23.22. 29
- 416 33. Cantin R, Diou J, Bélanger D, Tremblay AM, Gilbert C (2008) Discrimination between  
417 exosomes and HIV-1: purification of both vesicles from cell-free supernatants. *Journal of*  
418 *Immunological Methods* 338 (1):21-30
- 419 34. Greening DW, Xu R, Ji H, Tauro BJ, Simpson RJ (2015) A protocol for exosome isolation and  
420 characterization: evaluation of ultracentrifugation, density-gradient separation, and  
421 immunoaffinity capture methods. *Proteomic Profiling: Methods and Protocols*:179-209
- 422 35. Cvjetkovic A, Lötval J, Lässer C (2014) The influence of rotor type and centrifugation time on  
423 the yield and purity of extracellular vesicles. *Journal of Extracellular Vesicles* 3:DOI:  
424 10.3402/jev.v3403.23111. doi:10.3402/jev.v3.23111
- 425 36. Tauro BJ, Greening DW, Mathias RA, Mathivanan S, Ji H, Simpson RJ (2013) Two distinct  
426 populations of exosomes are released from LIM1863 colon carcinoma cell-derived organoids.  
427 *Molecular & Cellular Proteomics* 12 (3):587-598
- 428 37. Bhatia SN, Ingber DE (2014) Microfluidic organs-on-chips. *Nature Biotechnology* 32 (8):760-  
429 772
- 430 38. Böing AN, Van Der Pol E, Grootemaat AE, Coumans FA, Sturk A, Nieuwland R (2014) Single-  
431 step isolation of extracellular vesicles by size-exclusion chromatography. *Journal of Extracellular*  
432 *Vesicles* 3:DOI: 10.3402/jev.v3403.23430
- 433 39. Gámez-Valero A, Monguió-Tortajada M, Carreras-Planella L (2016) Size-Exclusion  
434 Chromatography-based isolation minimally alters Extracellular Vesicles' characteristics  
435 compared to precipitating agents. *Scientific Reports* 6:DOI: 10.1038/srep33641.  
436 doi:10.1038/srep33641
- 437 40. Grant R, Ansa-Addo E, Stratton D, Antwi-Baffour S, Jorfi S, Kholia S, Krige L, Lange S, Inal J  
438 (2011) A filtration-based protocol to isolate human plasma membrane-derived vesicles and  
439 exosomes from blood plasma. *Journal of Immunological Methods* 371 (1):143-151
- 440 41. Clayton A, Court J, Navabi H, Adams M, Mason MD, Hobot JA, Newman GR, Jasani B (2001)  
441 Analysis of antigen presenting cell derived exosomes, based on immuno-magnetic isolation and  
442 flow cytometry. *Journal of Immunological Methods* 247 (1):163-174
- 443 42. Yang JS, Lee JC, Byeon SK, Rha KH, Moon MH (2017) Size dependent lipidomic analysis of  
444 urinary exosomes from patients with prostate cancer by flow field-flow fractionation and  
445 nanoflow liquid chromatography-tandem mass spectrometry. *Analytical Chemistry* 89:2488-  
446 2496

- 447 43. Abramowicz A, Widlak P, Pietrowska M (2016) Proteomic analysis of exosomal cargo: the  
448 challenge of high purity vesicle isolation. *Mol Biosyst* 12 (5):1407-1419.  
449 doi:10.1039/c6mb00082g
- 450 44. Ku A, Lim HC, Evander M, Lilja H, Laurell T, Scheduling S, Ceder Y (2018) Rapid Acoustic  
451 Enrichment of Extracellular Vesicles from Biological Fluids. *Analytical Chemistry*
- 452 45. Rider MA, Hurwitz SN, Meckes Jr DG (2016) ExtraPEG: a polyethylene glycol-based method  
453 for enrichment of extracellular vesicles. *Scientific reports* 6:23978
- 454 46. Vik-Mo EO, Sandberg C, Olstorn H, Varghese M, Brandal P, Ramm-Pettersen J, Murrell W,  
455 Langmoen IA (2010) Brain tumor stem cells maintain overall phenotype and tumorigenicity after  
456 in vitro culturing in serum-free conditions. *Neuro-Oncology* 12 (12):1220-1230.  
457 doi:10.1093/neuonc/noq102
- 458 47. ThermoFisher Total Exosome Isolation Reagent (from cell culture media).  
459 <https://www.thermofisher.com/order/catalog/product/4478359?SID=srch-srp-4478359>.
- 460 48. Van Deun J, Mestdagh P, Sormunen R, Cocquyt V, Vermaelen K, Vandesompele J, Bracke M,  
461 De Wever O, Hendrix A (2014) The impact of disparate isolation methods for extracellular  
462 vesicles on downstream RNA profiling. *J Extracell Vesicles* 3 (1):24858. doi:10.3402/jev.v3.24858
- 463 49. Pan B-T, Teng K, Wu C, Adam M, Johnstone RM (1985) Electron microscopic evidence for  
464 externalization of the transferrin receptor in vesicular form in sheep reticulocytes. *The Journal*  
465 *of Cell Biology* 101 (3):942-948. doi:10.1083/jcb.101.3.942
- 466 50. Pan B-T, Johnstone RM (1983) Fate of the transferrin receptor during maturation of sheep  
467 reticulocytes in vitro: selective externalization of the receptor. *Cell* 33 (3):967-978
- 468 51. Lobb RJ, Becker M, Wen SW, Wong CSF, Wiegman AP, Leimgruber A, Moller A (2015)  
469 Optimized exosome isolation protocol for cell culture supernatant and human plasma. *J*  
470 *Extracell Vesicles* 4:11. doi:10.3402/jev.v4.27031
- 471 52. Jenjaroenpun P, Kremenska Y, Nair VM, Kremenskoy M, Joseph B, Kurochkin IV (2013)  
472 Characterization of RNA in exosomes secreted by human breast cancer cell lines using next-  
473 generation sequencing. *PeerJ* 1:e201. doi:10.7717/peerj.201
- 474 53. Palazzolo G, Albanese NN, Di Cara G, Gyax D, Vittorelli ML, Pucci-Minafra I (2012)  
475 Proteomic analysis of exosome-like vesicles derived from breast cancer cells. *Anticancer*  
476 *Research* 32 (3):847-860
- 477 54. ThermoFisherScientific (2016) Boldly go above and beyond.  
478 <https://tools.thermofisher.com/content/sfs/brochures/Exosomes-brochure.pdf>. Accessed  
479 COL12585 0916
- 480 55. Liu F, Vermesh O, Mani V, Ge TJ, Madsen SJ, Sabour A, Hsu E-C, Gowrishankar G, Kanada M,  
481 Jokerst JV, Sierra RG, Chang E, Lau K, Sridhar K, Bermudez A, Pitteri SJ, Stoyanova T, Sinclair R,  
482 Nair VS, Gambhir SS, Demirci U (2017) The Exosome Total Isolation Chip. *ACS Nano* 11  
483 (11):10712-10723. doi:10.1021/acsnano.7b04878
- 484 56. Lötvall J, Hill AF, Hochberg F, Buzás EI, Di Vizio D, Gardiner C, Gho YS, Kurochkin IV,  
485 Mathivanan S, Quesenberry P (2014) Minimal experimental requirements for definition of  
486 extracellular vesicles and their functions: a position statement from the International Society for  
487 Extracellular Vesicles. *Journal of Extracellular Vesicles* 3:26913-23078
- 488 57. Berg HS, Seterdal KE, Smetop T, Rozenvalds R, Brandtzaeg OK, Vehus T, Lundanes E, Wilson  
489 SR (2017) Self-packed core shell nano liquid chromatography columns and silica-based  
490 monolithic trap columns for targeted proteomics. *Journal of Chromatography A* 1498:111-119

- 491 58. Redzic JS, Ung TH, Graner MW (2014) Glioblastoma extracellular vesicles: reservoirs of  
492 potential biomarkers. *Pharmacogenomics and personalized medicine* 7:65-77.  
493 doi:10.2147/pgpm.s39768
- 494 59. Thuringer D, Hammann A, Benikhlef N, Fourmaux E, Bouchot A, Wettstein G, Solary E,  
495 Garrido C (2011) Transactivation of the epidermal growth factor receptor by heat shock protein  
496 90 via Toll-like receptor 4 contributes to the migration of glioblastoma cells. *The Journal of*  
497 *biological chemistry* 286 (5):3418-3428. doi:10.1074/jbc.M110.154823
- 498 60. Graner MW, Cumming RI, Bigner DD (2007) The Heat Shock Response and Chaperones/Heat  
499 Shock Proteins in Brain Tumors: Surface Expression, Release, and Possible Immune  
500 Consequences. *The Journal of Neuroscience* 27 (42):11214-11227. doi:10.1523/jneurosci.3588-  
501 07.2007
- 502 61. Wade A, Robinson AE, Engler JR, Petritsch C, James CD, Phillips JJ (2013) Proteoglycans and  
503 their roles in brain cancer. *The FEBS journal* 280 (10):2399-2417. doi:10.1111/febs.12109
- 504 62. Mooney KL, Choy W, Sidhu S, Pelargos P, Bui TT, Voth B, Barnette N, Yang I (2016) The role  
505 of CD44 in glioblastoma multiforme. *Journal of Clinical Neuroscience* 34:1-5.  
506 doi:<https://doi.org/10.1016/j.jocn.2016.05.012>
- 507 63. Kraan J, van den Broek P, Verhoef C, Grunhagen DJ, Taal W, Gratama JW, Sleijfer S (2014)  
508 Endothelial CD276 (B7-H3) expression is increased in human malignancies and distinguishes  
509 between normal and tumour-derived circulating endothelial cells. *British journal of cancer* 111  
510 (1):149-156. doi:10.1038/bjc.2014.286
- 511 64. Beliakoff J, Whitesell L (2004) Hsp90: an emerging target for breast cancer therapy. *Anti-  
512 Cancer Drugs* 15 (7):651-662
- 513 65. Price JT, Tiganis T, Agarwal A, Djakiew D, Thompson EW (1999) Epidermal growth factor  
514 promotes MDA-MB-231 breast cancer cell migration through a phosphatidylinositol 3-kinase  
515 and phospholipase C-dependent mechanism. *Cancer Research* 59 (21):5475-5478
- 516 66. de Vrij J, Maas SLN, Kwappenberg KMC, Schnoor R, Kleijn A, Dekker L, Luider TM, de Witte  
517 LD, Litjens M, van Strien ME, Hol EM, Kroonen J, Robe PA, Lamfers ML, Schilham MW, Broekman  
518 MLD (2015) Glioblastoma-derived extracellular vesicles modify the phenotype of monocytic  
519 cells. *International Journal of Cancer* 137 (7):1630-1642. doi:10.1002/ijc.29521  
520
- 521
- 522
- 523
- 524
- 525
- 526

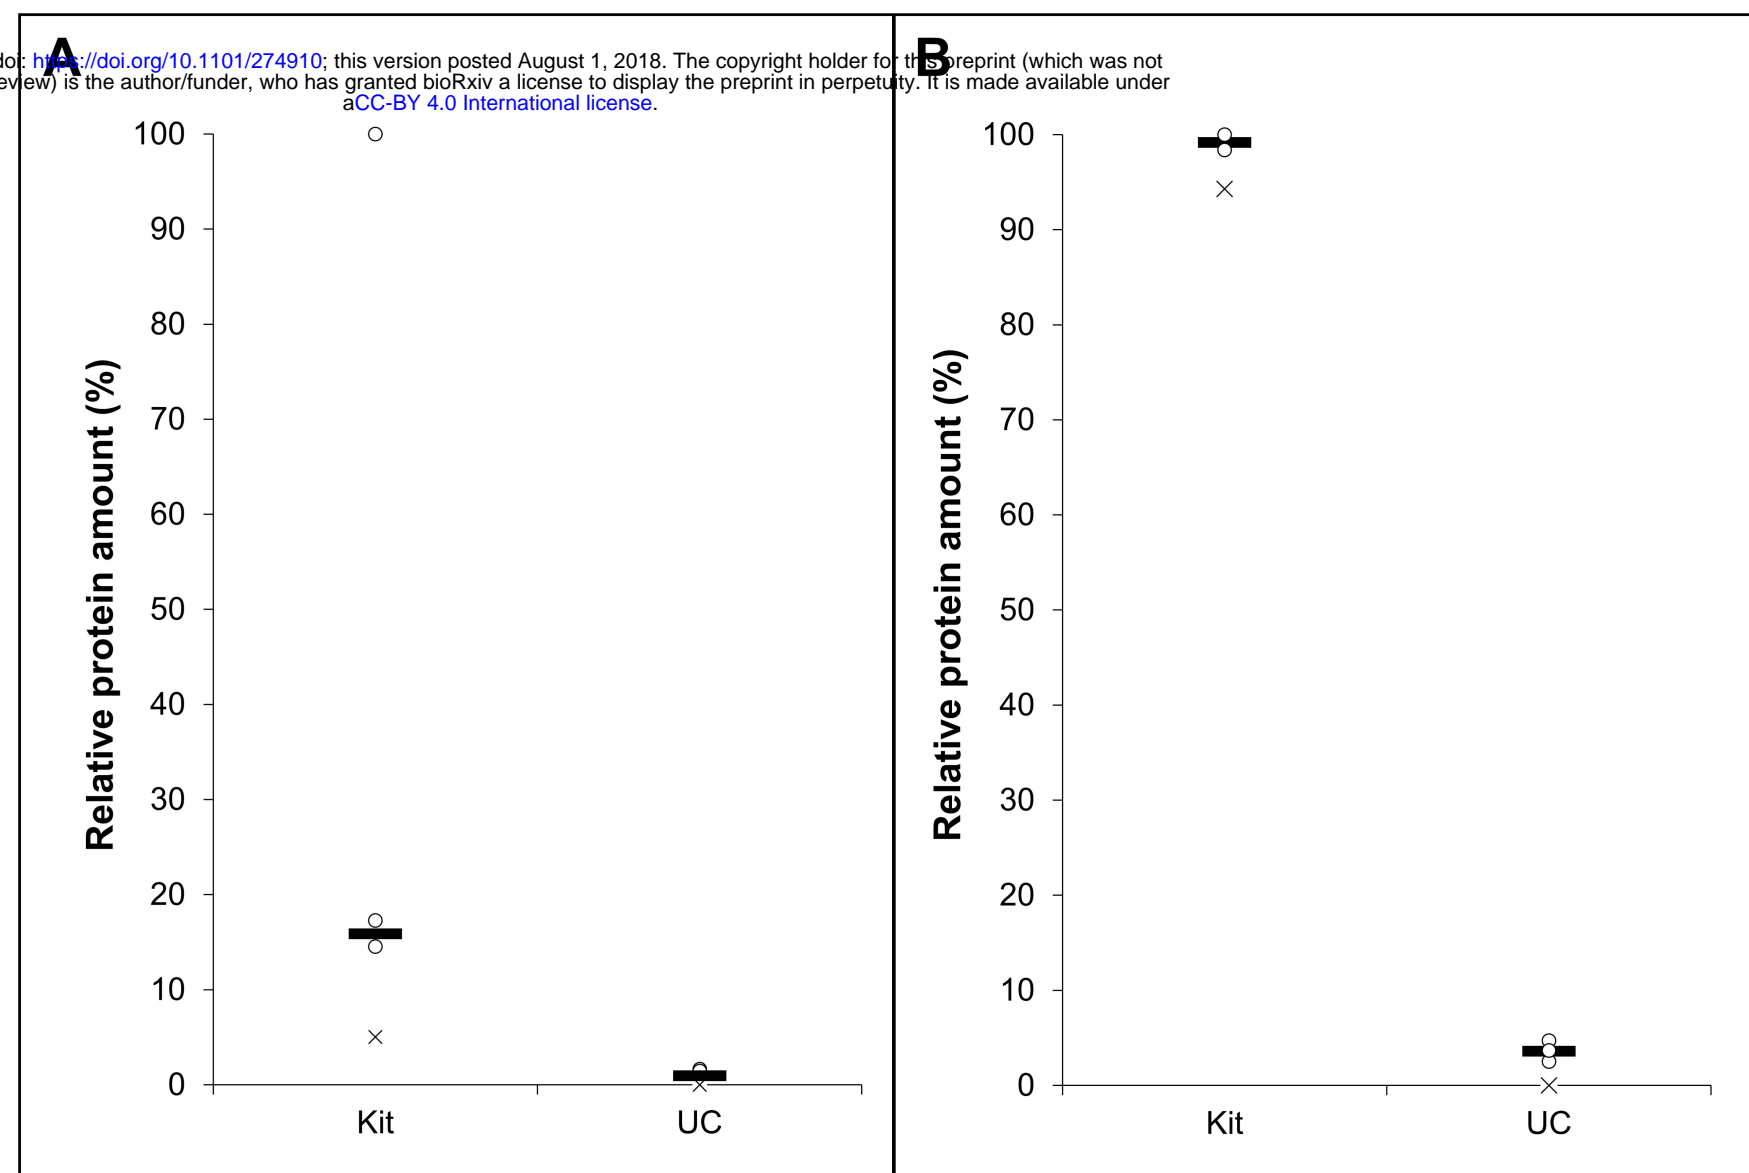

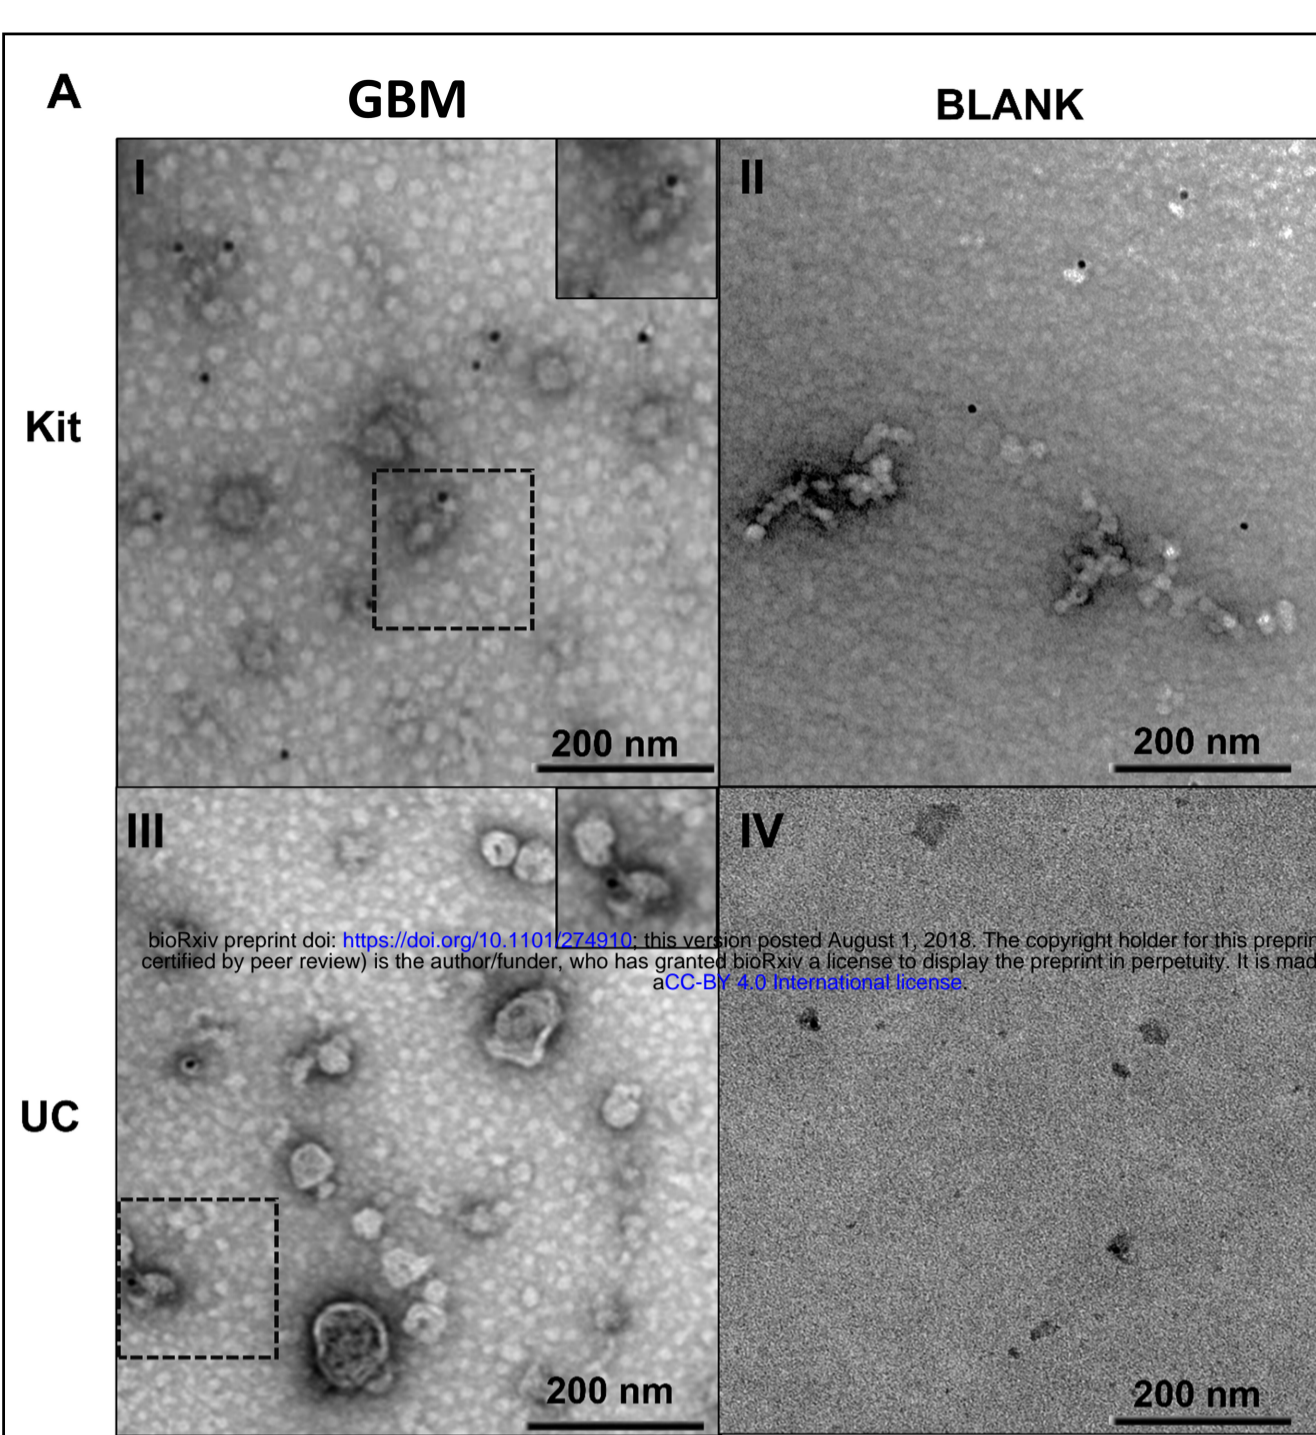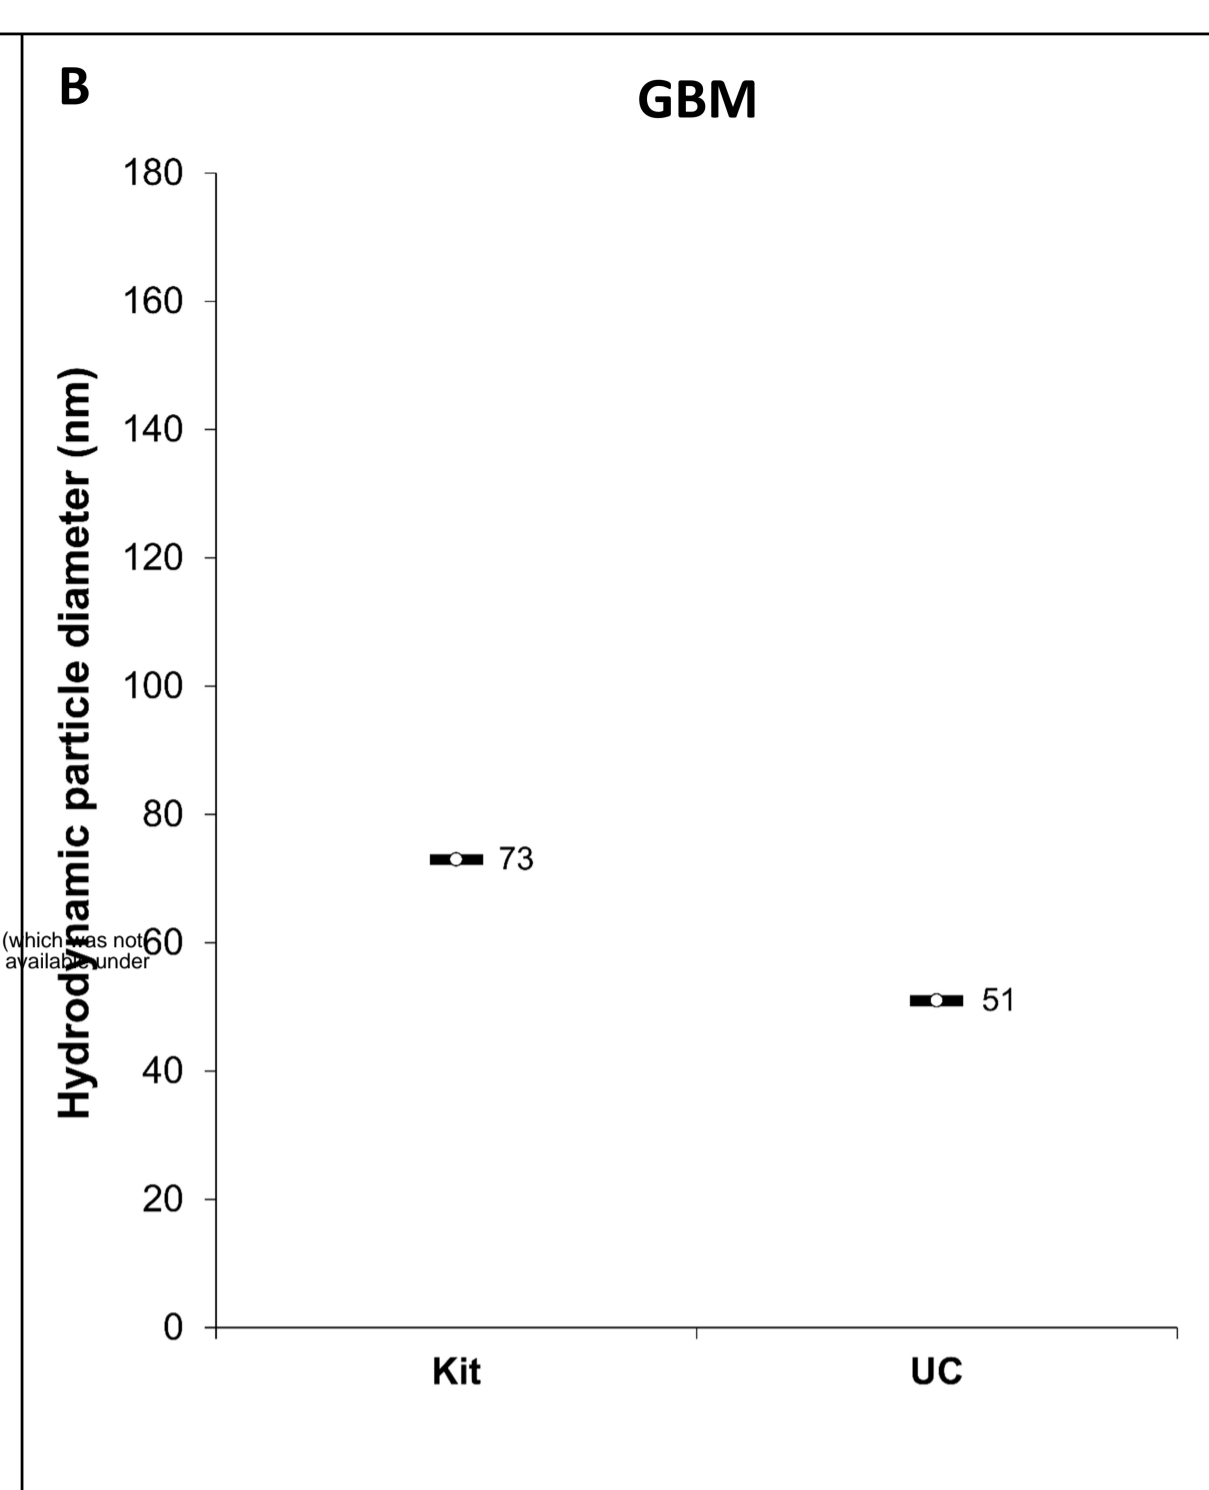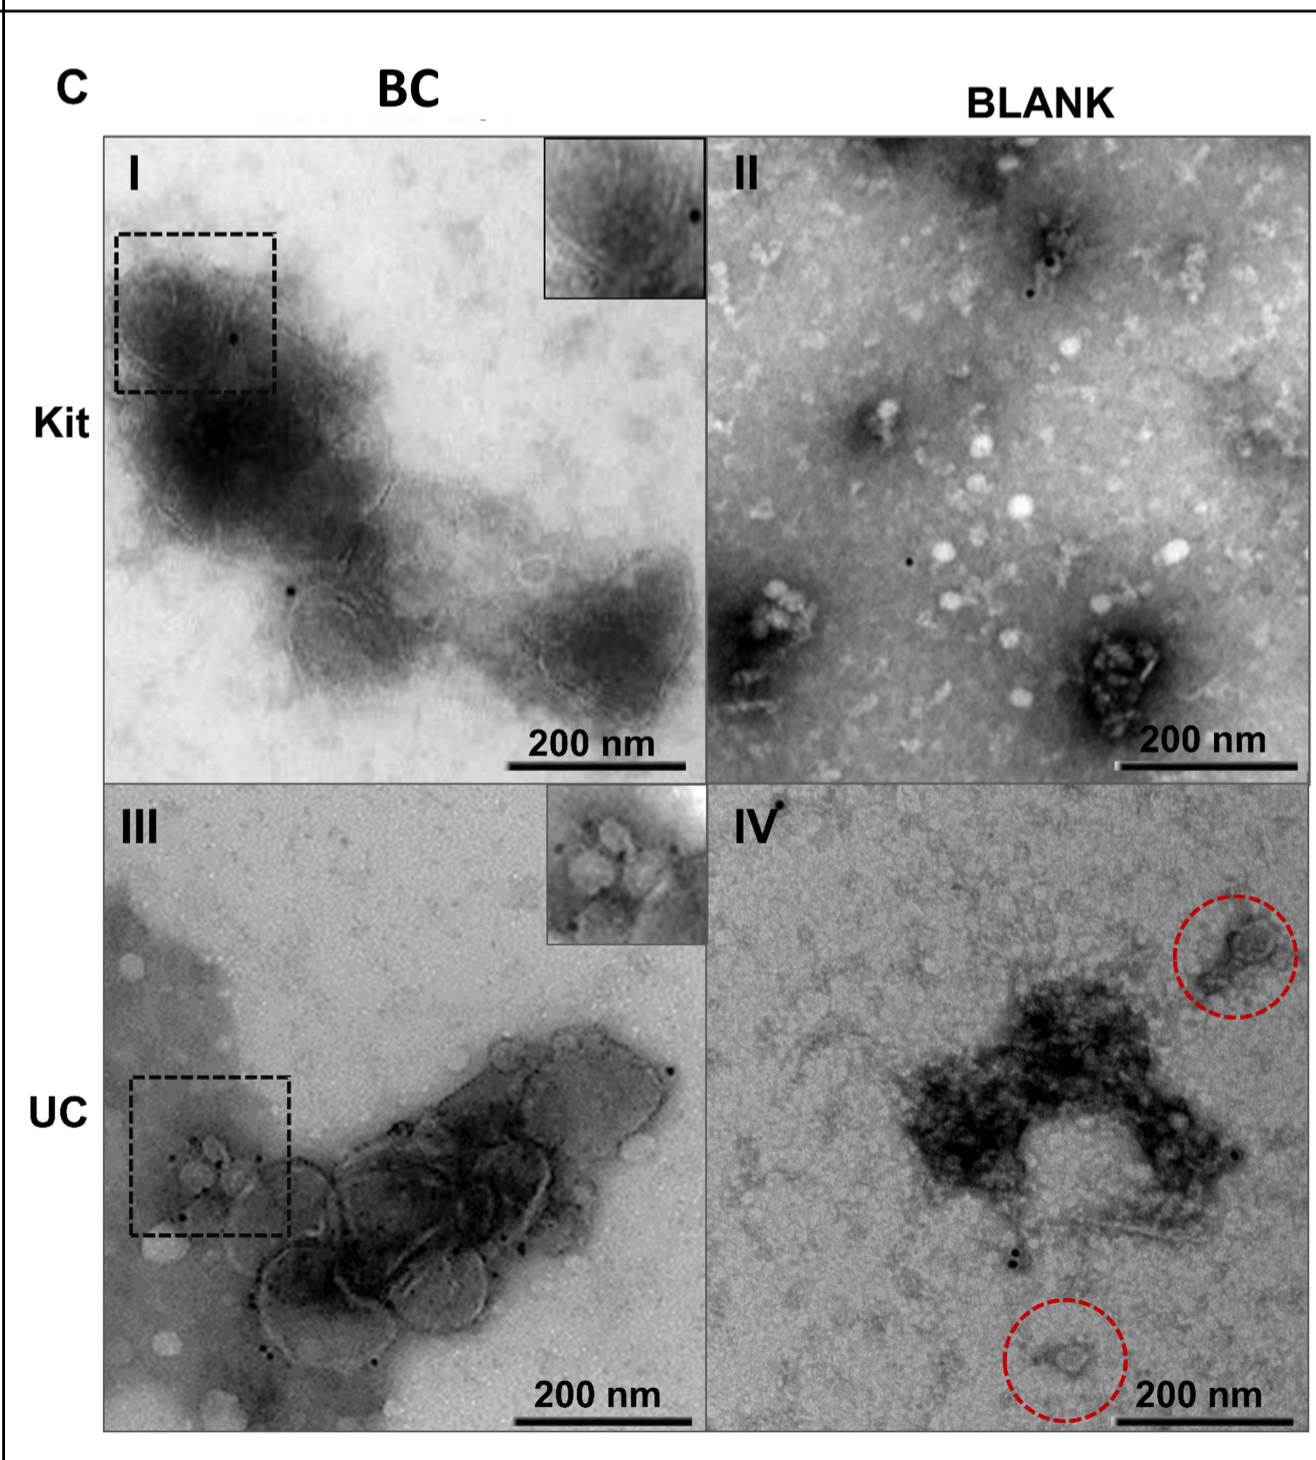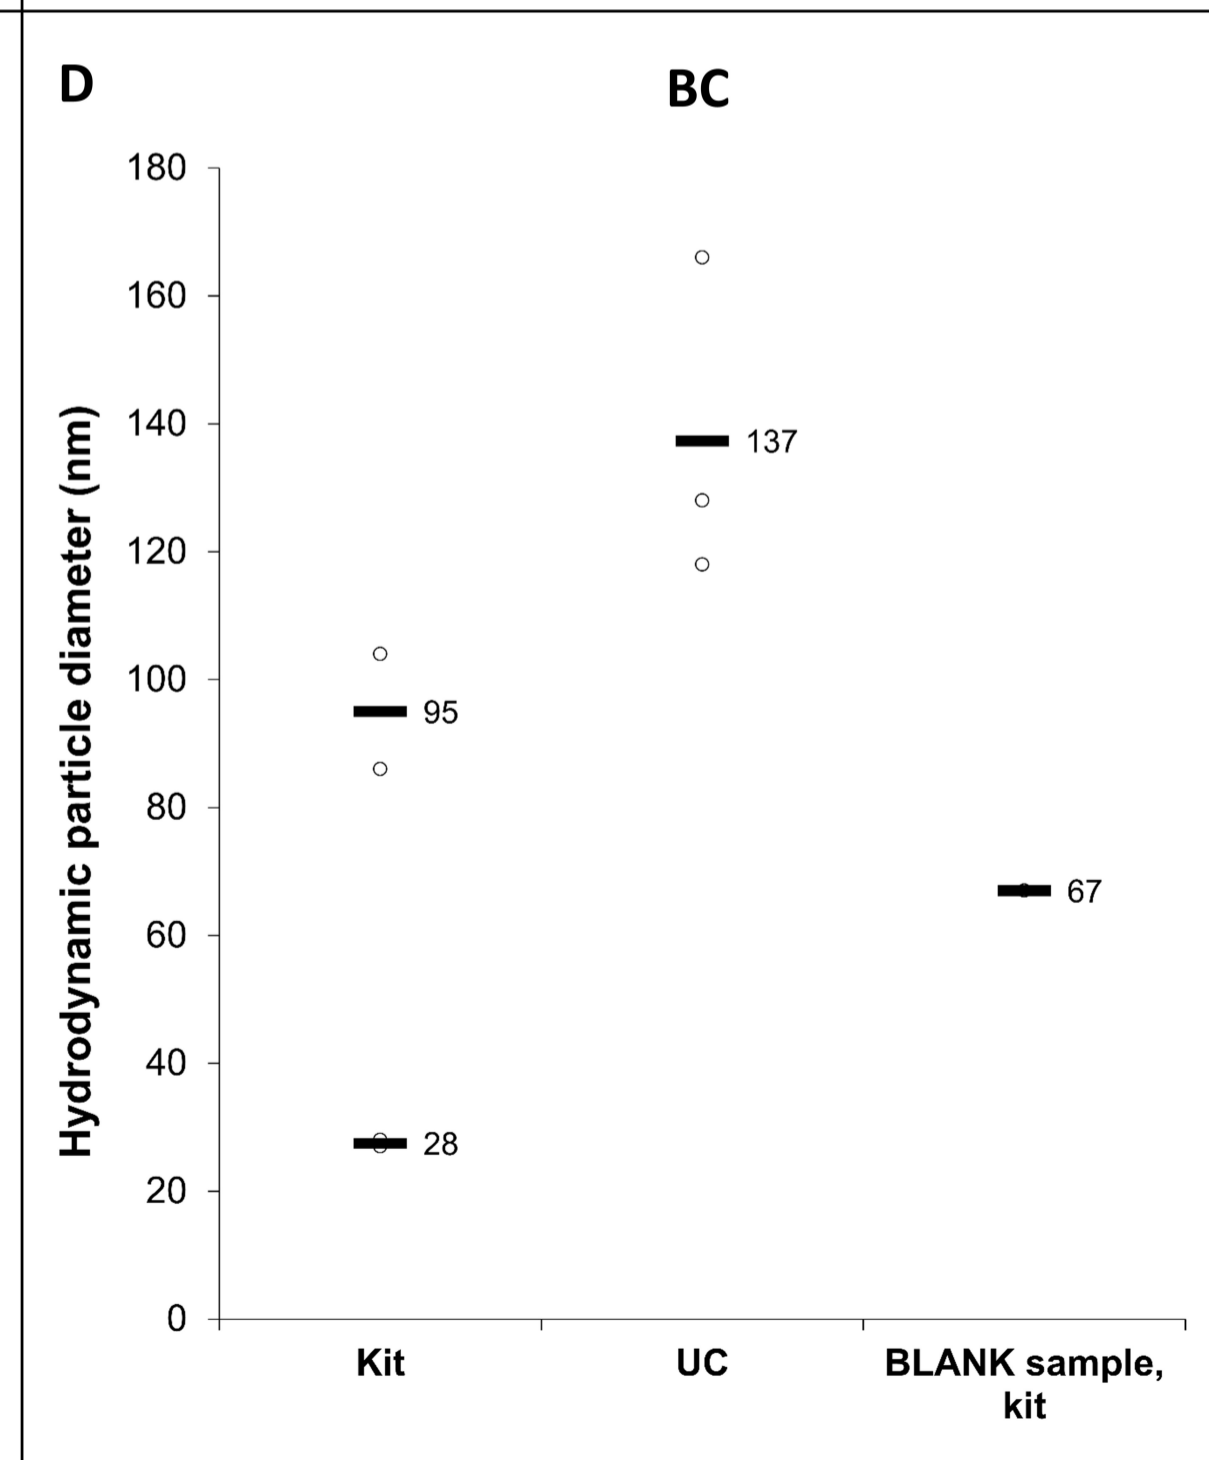

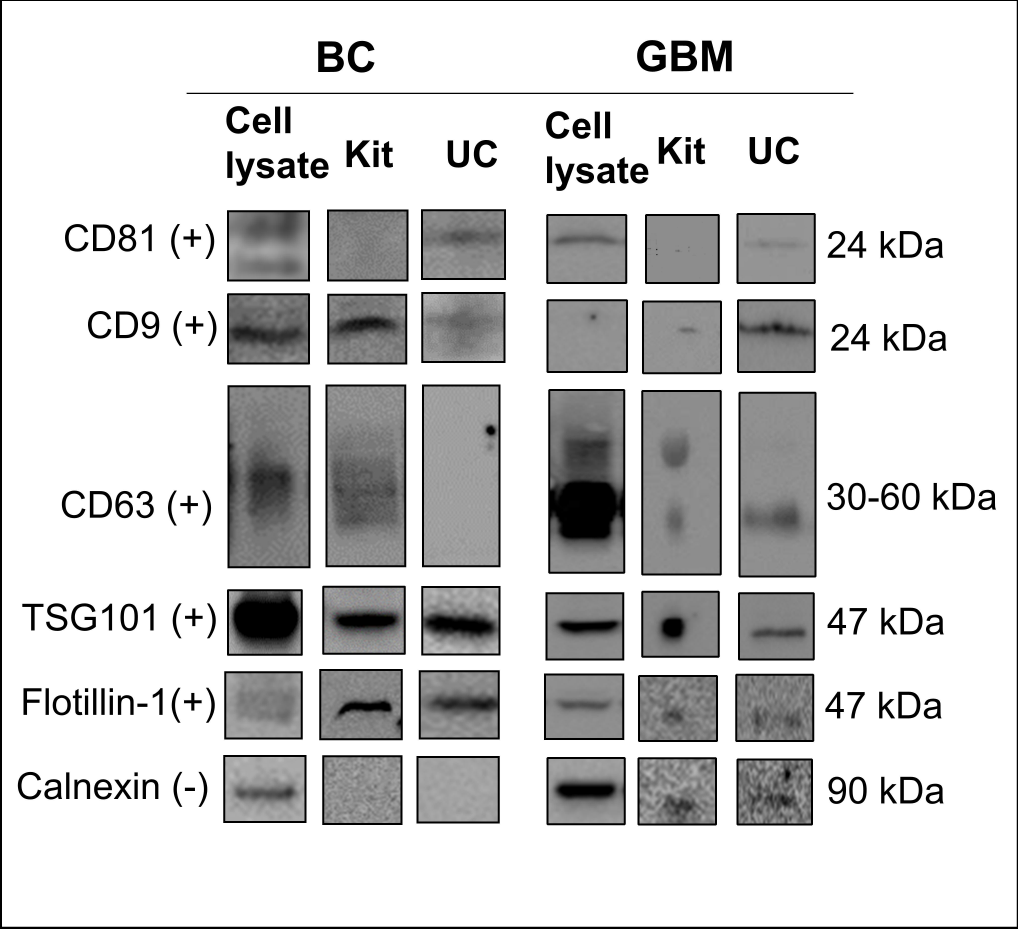

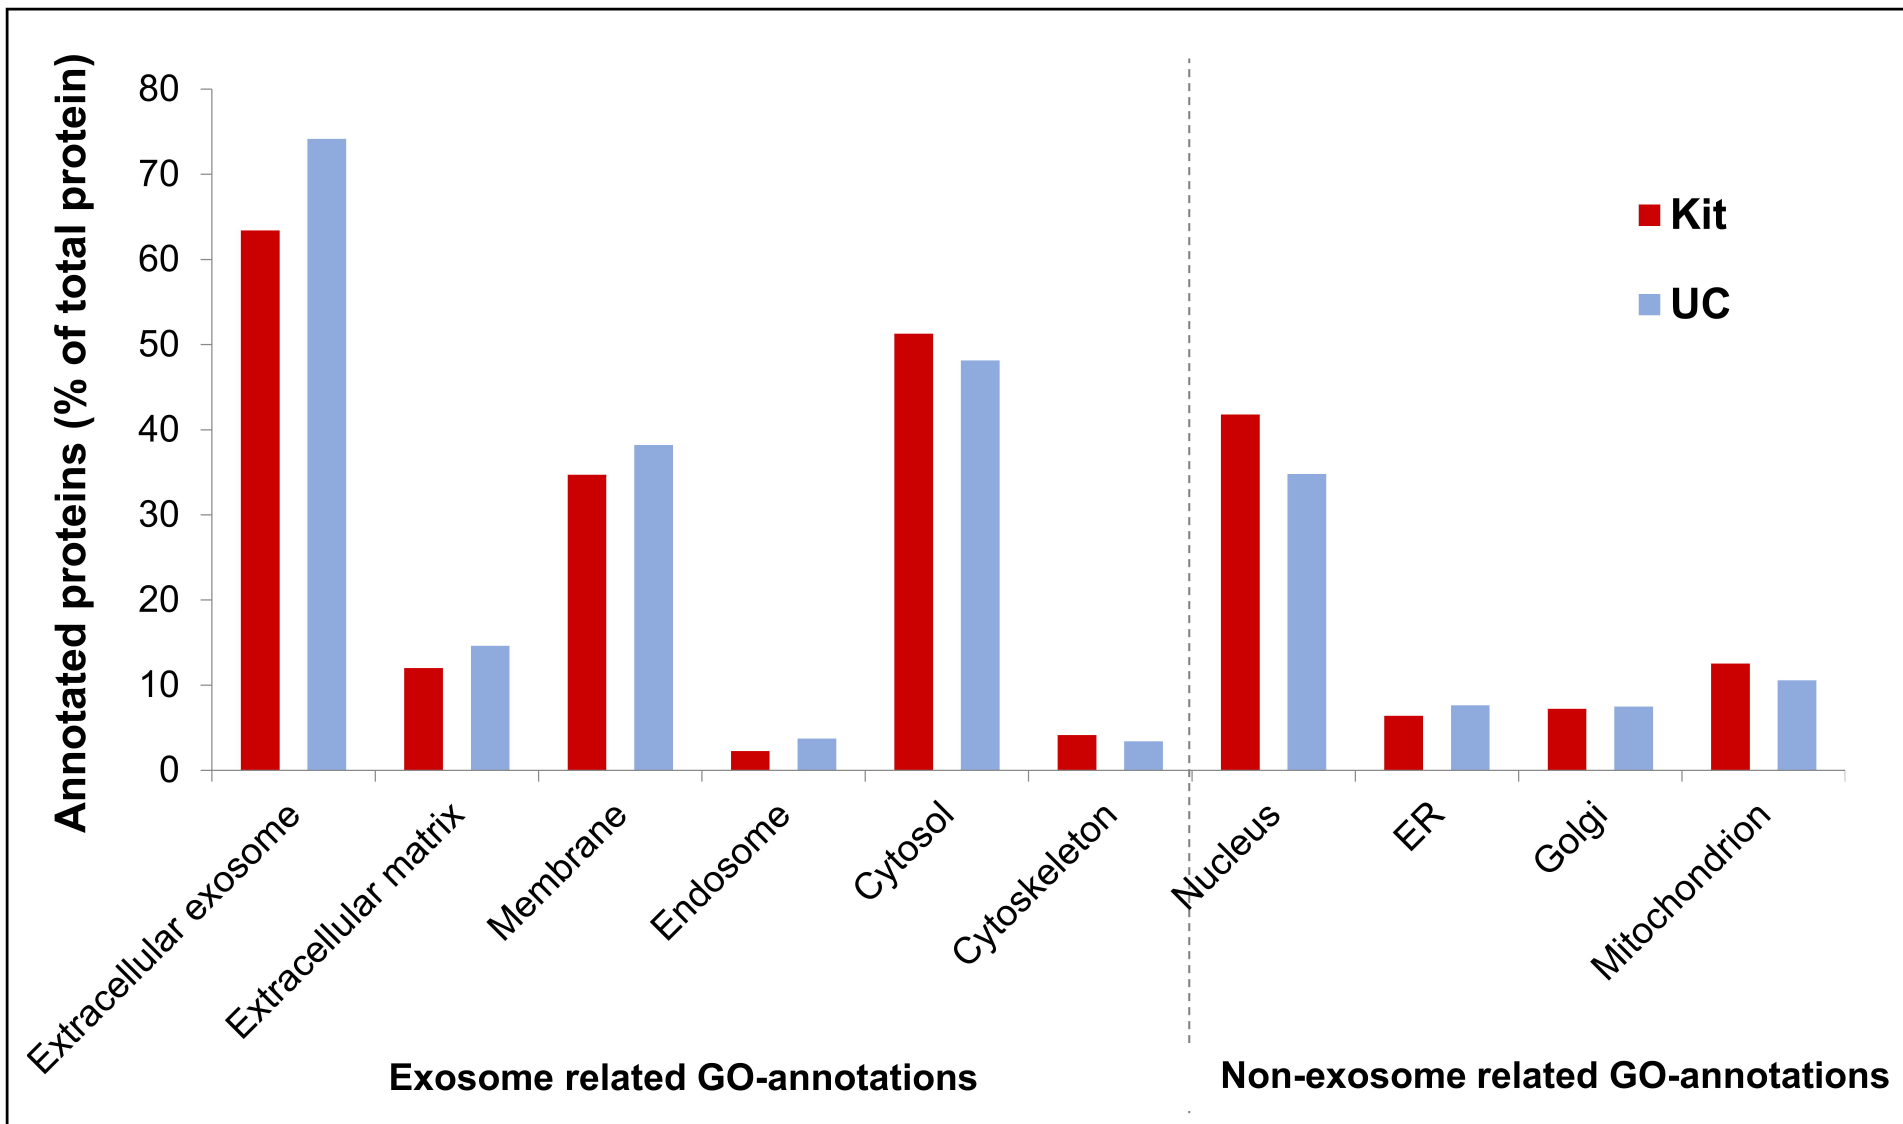

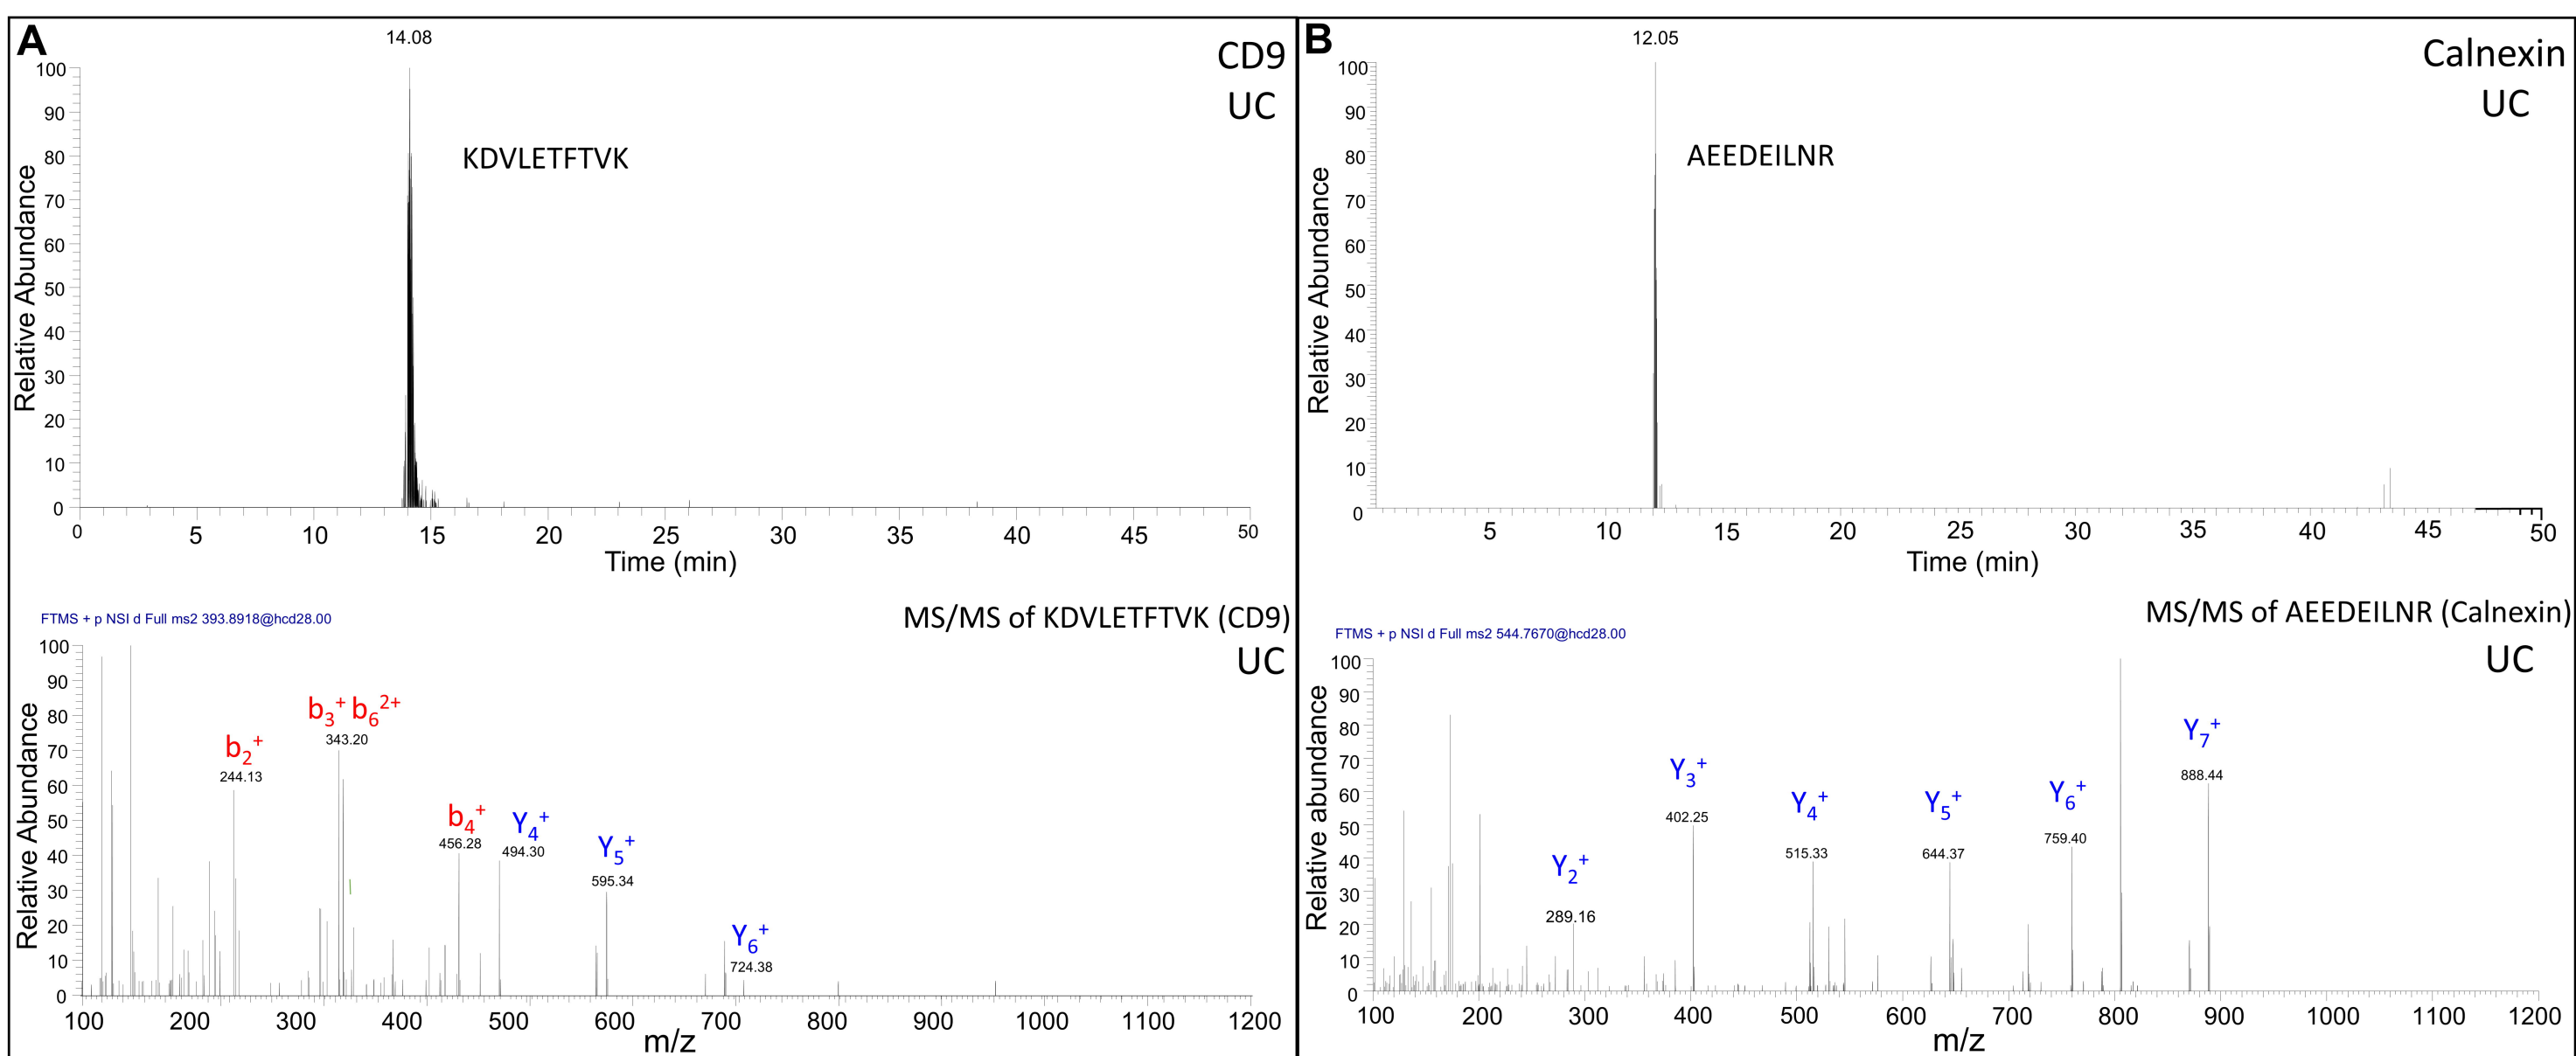

Source: https://www.biorxiv.org/content/early/2018/08/01/274910.full.pdf
